# Supplementary material for: The interaction between tea polyphenols and wheat gluten in dough formation and bread making
Source: Royal Society of Chemistry journal article supplement (doi:10.1039/d2fo02576k), 2022-01-01
Supplement: d2fo02576k1.pdf [file d2fo02576k1.pdf]

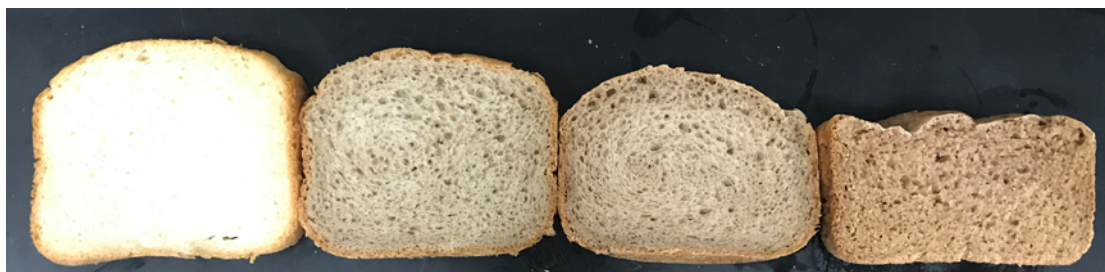

Figure S1. The impact of TPL (0, 0.5, 1, 2% from left to right ) on the loaf volume of bread.

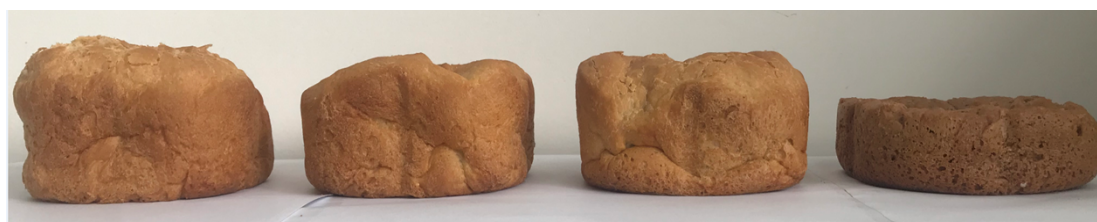

Figure S2. The impact of microencapsulated TPL on bread making. (Control, capsule control, encapsulated TPI, and TPL (2%) from left to right).

Table S1. Effect of the tea polyphenols (TP) addition on the consumer acceptance of bread

| TPL (%)            | 0                      | 0.5                    | 1                      | 2                      |
|--------------------|------------------------|------------------------|------------------------|------------------------|
| Specific volume    | 4.38±0.52 <sup>a</sup> | 3.88±0.35 <sup>b</sup> | 2.88±0.64 <sup>c</sup> | 2.13±0.35 <sup>d</sup> |
| Color              | 4.63±0.52 <sup>a</sup> | 3.75±0.46 <sup>b</sup> | 2.88±0.35 <sup>c</sup> | 2.25±0.46 <sup>d</sup> |
| Flavor/taste       | 4.13±0.35 <sup>a</sup> | 3.63±0.52 <sup>b</sup> | 3.00±0.53 <sup>c</sup> | 1.63±0.52 <sup>d</sup> |
| Texture            | 4.63±0.52 <sup>a</sup> | 4.13±0.35 <sup>b</sup> | 3.50±0.53 <sup>c</sup> | 1.88±0.35 <sup>d</sup> |
| Internal structure | 4.75±0.46 <sup>a</sup> | 3.88±0.35 <sup>b</sup> | 3.13±0.35 <sup>c</sup> | 1.75±0.46 <sup>d</sup> |
| Acceptance         | 4.63±0.52 <sup>a</sup> | 3.75±0.46 <sup>b</sup> | 2.63±0.52 <sup>c</sup> | 1.88±0.35 <sup>d</sup> |
| Total score        | 27.13                  | 23.02                  | 18.02                  | 11.51                  |

Different letters represent significant difference at  $p < 0.05$ .

Table S2. Effect of tea polyphenols (TP) addition at different levels on the color of bread

| TPL (%) | 0                       | 0.5                     | 1                       | 2                       |
|---------|-------------------------|-------------------------|-------------------------|-------------------------|
| L       | 74.25±0.44 <sup>a</sup> | 60.70±0.59 <sup>b</sup> | 57.59±0.65 <sup>c</sup> | 54.10±0.40 <sup>d</sup> |
| a       | 0.25±0.11 <sup>d</sup>  | 3.02±0.12 <sup>c</sup>  | 3.85±0.26 <sup>b</sup>  | 5.14±0.09 <sup>a</sup>  |
| b       | 15.24±0.20 <sup>a</sup> | 12.70±0.29 <sup>b</sup> | 10.08±0.27 <sup>c</sup> | 8.18±0.13 <sup>d</sup>  |
| WI      | 70.08±0.48 <sup>a</sup> | 58.59±0.62 <sup>b</sup> | 56.24±0.61 <sup>c</sup> | 53.09±0.40 <sup>d</sup> |

Note, L: lightness (black-white), a: hue (green-red), b: saturation (yellow-blue), WI: whiteness index
